# Supplementary material for: Thienoisoindigo-based low-band gap polymers for organic electronic devices
Source: Royal Society of Chemistry journal article supplement (doi:10.1039/c2py20699d), 2012-09-12
Supplement: c2py20699d.pdf [file c2py20699d.pdf]

## Electronic Supplementary Information

# Thienoisindigo-based Low-Band Gap Polymer for Organic Electronic Devices

*Yoshiko Koizumi,<sup>\*a,b</sup> Marina Ide,<sup>b</sup> Akinori Saeki,<sup>b,c</sup> Chakkooth Vijayakumar,<sup>b</sup> Bijitha Balan,<sup>b</sup>*

*Masuki Kawamoto,<sup>a</sup> and Shu Seki<sup>\*b</sup>*

*Functional Soft Matter Research Group, RIKEN Advanced Science Institute, 2-1Hirosawa, Wako, Saitama 351-0198, Japan. Department of Applied Chemistry, Graduate School of Engineering, Osaka University, 2-1 Yamadaoka, Suita, Osaka 565-0871, Japan. PRESTO, Japan Science and Technology Agency (JST), 4-1-8 Honcho Kawaguchi, Saitama 332-0012, Japan.*

[koizumi@chem.eng.osaka-u.ac.jp](mailto:koizumi@chem.eng.osaka-u.ac.jp) (Y.K.), [seki@chem.eng.osaka-u.ac.jp](mailto:seki@chem.eng.osaka-u.ac.jp) (S.S.), Fax: +81-6-6879-4586;

Tel: +81-6-6879-4588

<sup>a</sup>RIKEN Advanced Science Institute

<sup>b</sup>Osaka University

<sup>c</sup>PRESTO, JST

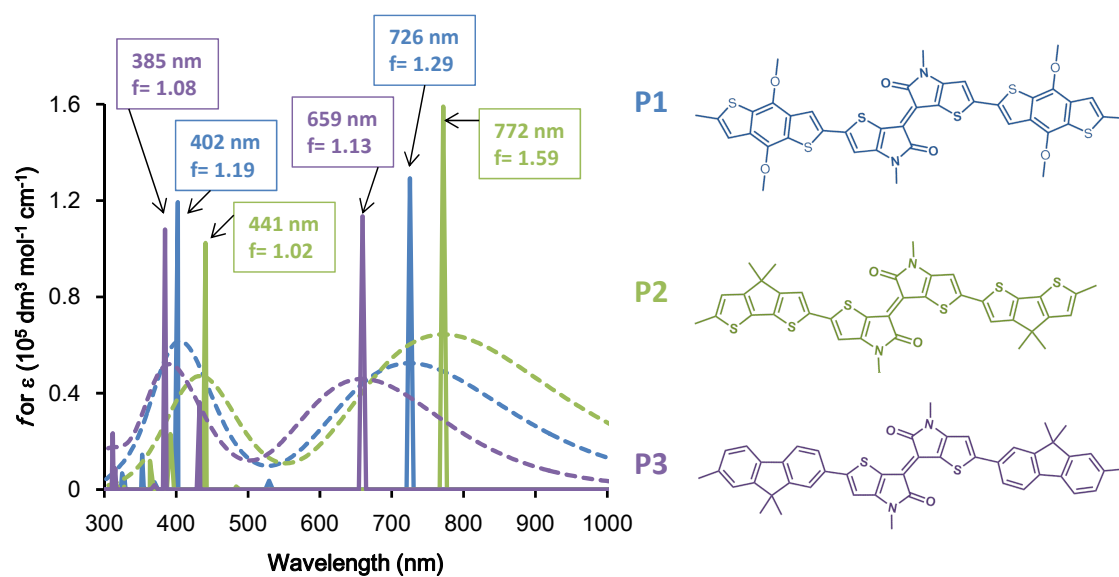

**Figure S1.** Absorption features of P1-3 obtained from DFT calculation. The solid lines represent oscillator strength. The dotted lines were reconstructed by applying Gaussian function to each oscillator strength.

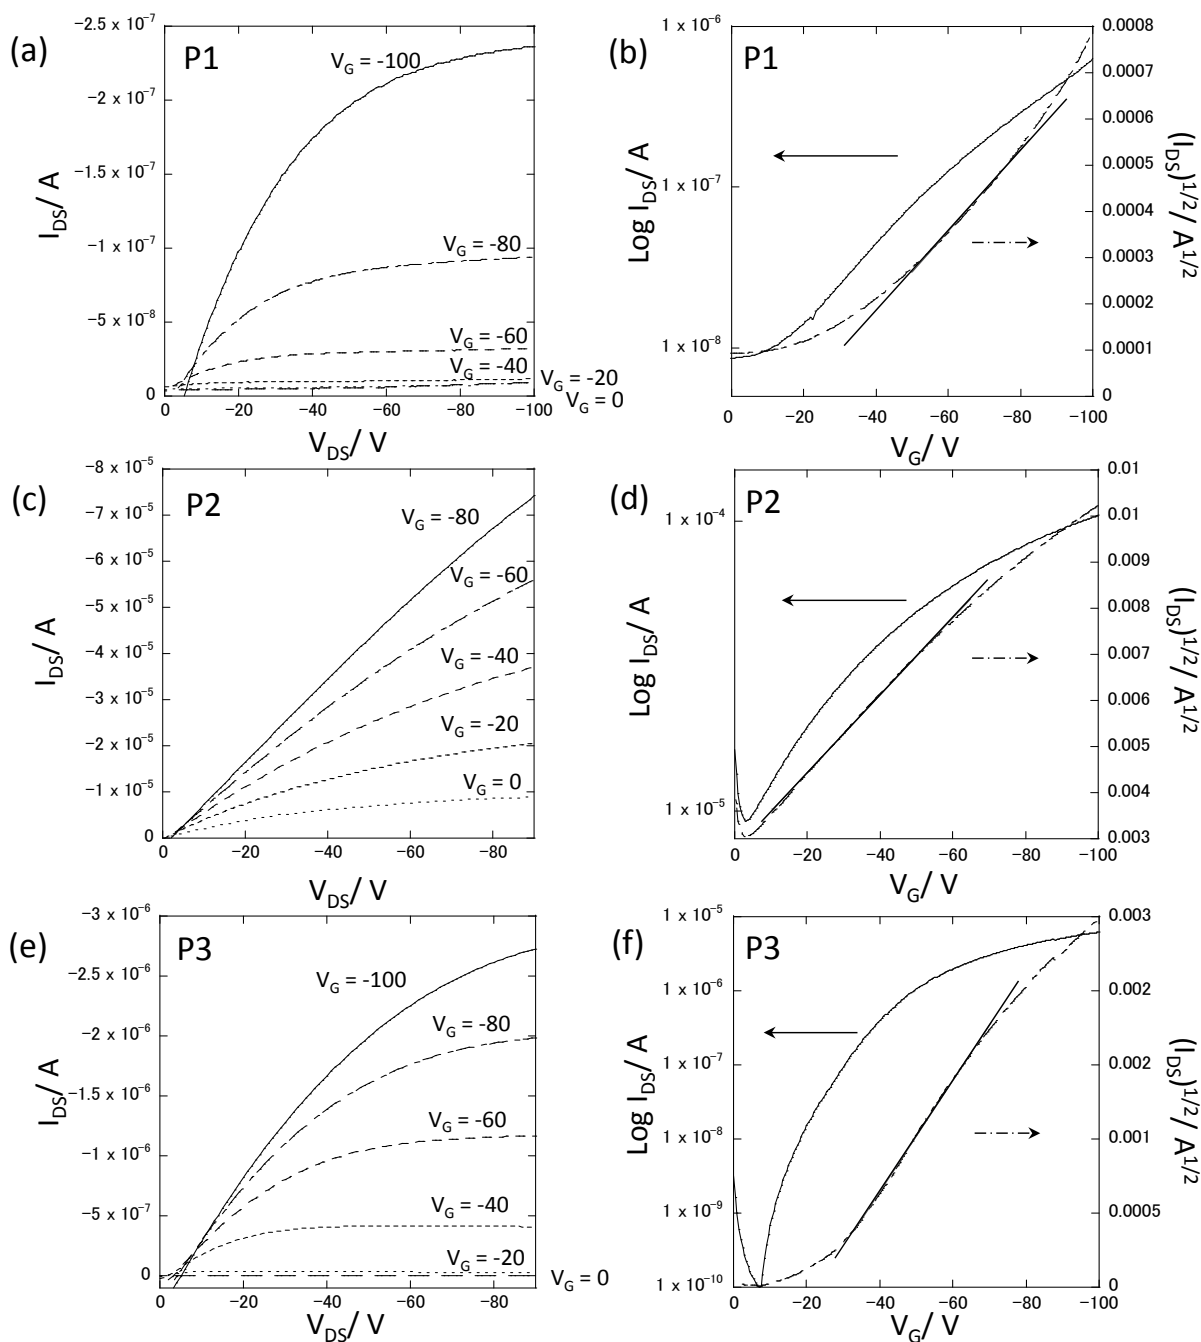

**Figure S2.** FET current-voltage characteristics of (a)(b) P1, (c)(d) P2, and (e)(f) P3 copolymer (a),(c), and (e) are output curves at different gate voltages (0 to -100 V or -80 V); (b),(d), and (f) are transfer curves at  $V_{DS} = -100$  V for P1 and P3, -80 V for P2. The channel length:  $L$  were 100, 20, and 20  $\mu\text{m}$  for P1, P2, and P3, respectively; the channel width:  $W$  was 3 mm, and the film thicknesses were 68 ~ 100 nm. The capacitance:  $C_i$  was 17.3  $\text{nF cm}^{-2}$ . The measurements were carried out at room temperature. The hole mobilities of  $0.34 \times 10^{-3}$ ,  $5.3 \times 10^{-3}$ , and  $1.1 \times 10^{-3} \text{ cm}^2 \text{ V}^{-1} \text{ s}^{-1}$  were obtained for P1, P2, and P3, respectively, from the slopes of square-root of the drain current vs.  $V_G$ .

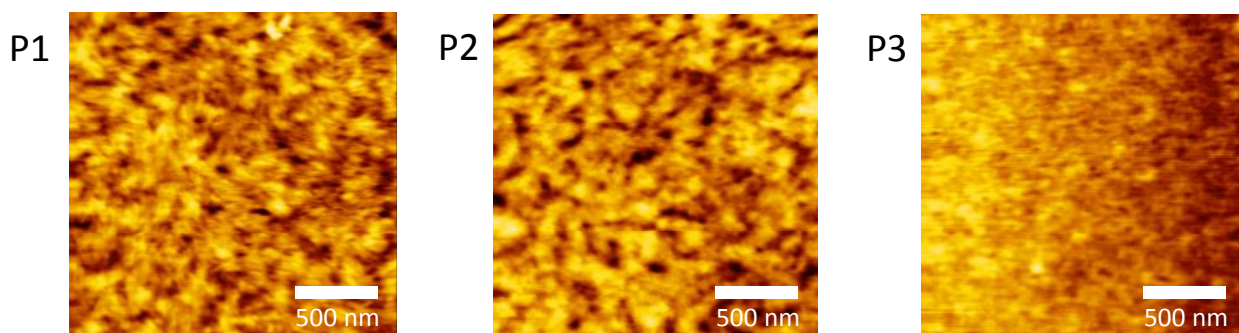

**Figure S3.** AFM micrographs of P1, P2, and P3. The sample films were prepared by spin-casting from chloroform solution for P1 and P3, chlorobenzene solution for P2, then dried under vacuum. Films of P1 and P3 were no thermal annealing, that of P2 was thermal annealed at 160 °C for 10 min. All images are  $2 \times 2 \mu\text{m}$  scale. The surface roughness are (P1) 1.4 nm, (P2) 1.0 nm, and (P3) 0.47 nm.

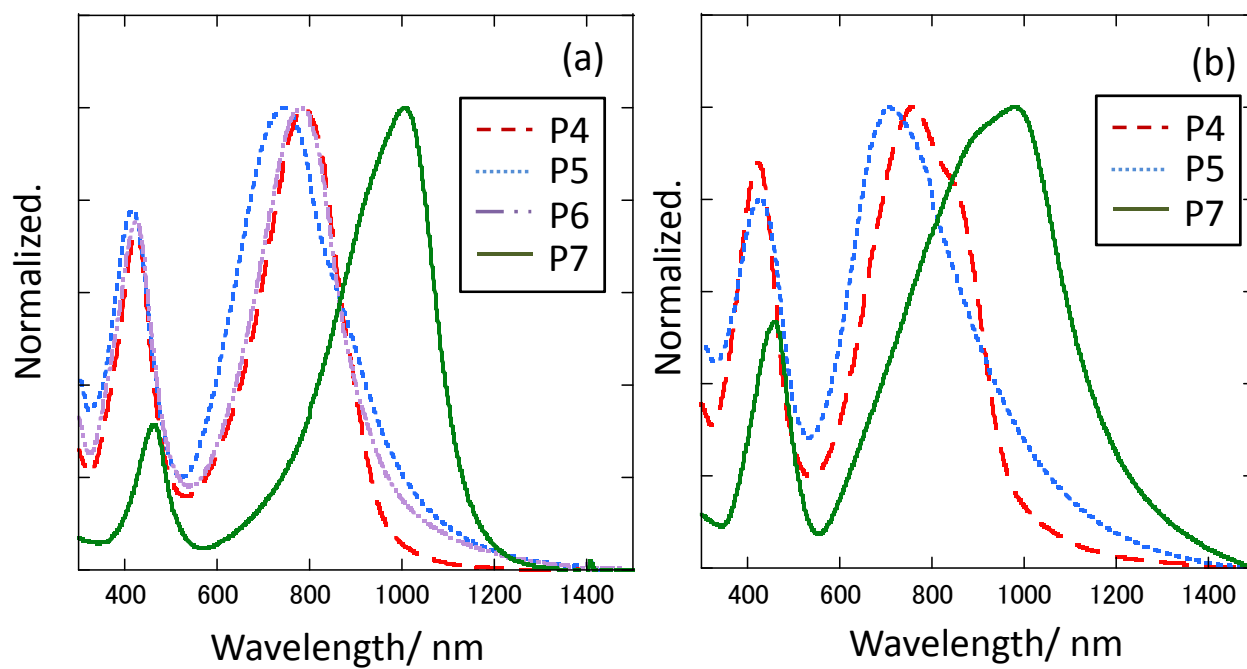

**Figure S4.** (a) Normalized electronic absorption spectra of P4 (red dashed line), P5 (blue dotted line), P6 (purple chain line) and P7 (green solid line) in chloroform at room temperature. (b) Normalized electronic absorption spectra of P4, P5, and P7 films drop-casted from chloroform solution.

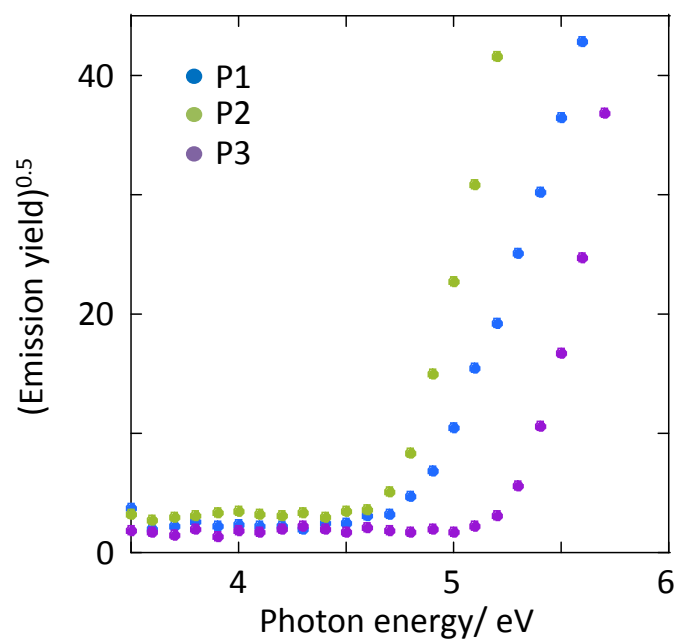

**Figure S5.** Photon energy profile for drop-casted films of P1 (blue), P2 (green), and P3 (purple) measured by UV photoelectron spectroscopy.
